# Supplementary material for: The Irrecoverable Loss in Sleep on Weekdays of Two Distinct Chronotypes Can Be Equalized by Permitting a >2 h Difference in Waking Time
Source: MDPI journal article supplement (doi:10.3390/app12168092), 2022-08-12
Supplement: s1 [file s1]

Archive with 1 entries (1 files):
- applsci-1817024-supplementary.pdf
